# Supplementary material for: Impact of ATM and DNA-PK Inhibition on Gene Expression and Individual Response of Human Lymphocytes to Mixed Beams of Alpha Particles and X-Rays
Source: MDPI journal article supplement (doi:10.3390/cancers11122013), 2019-12-13
Supplement: s1 [file s1]

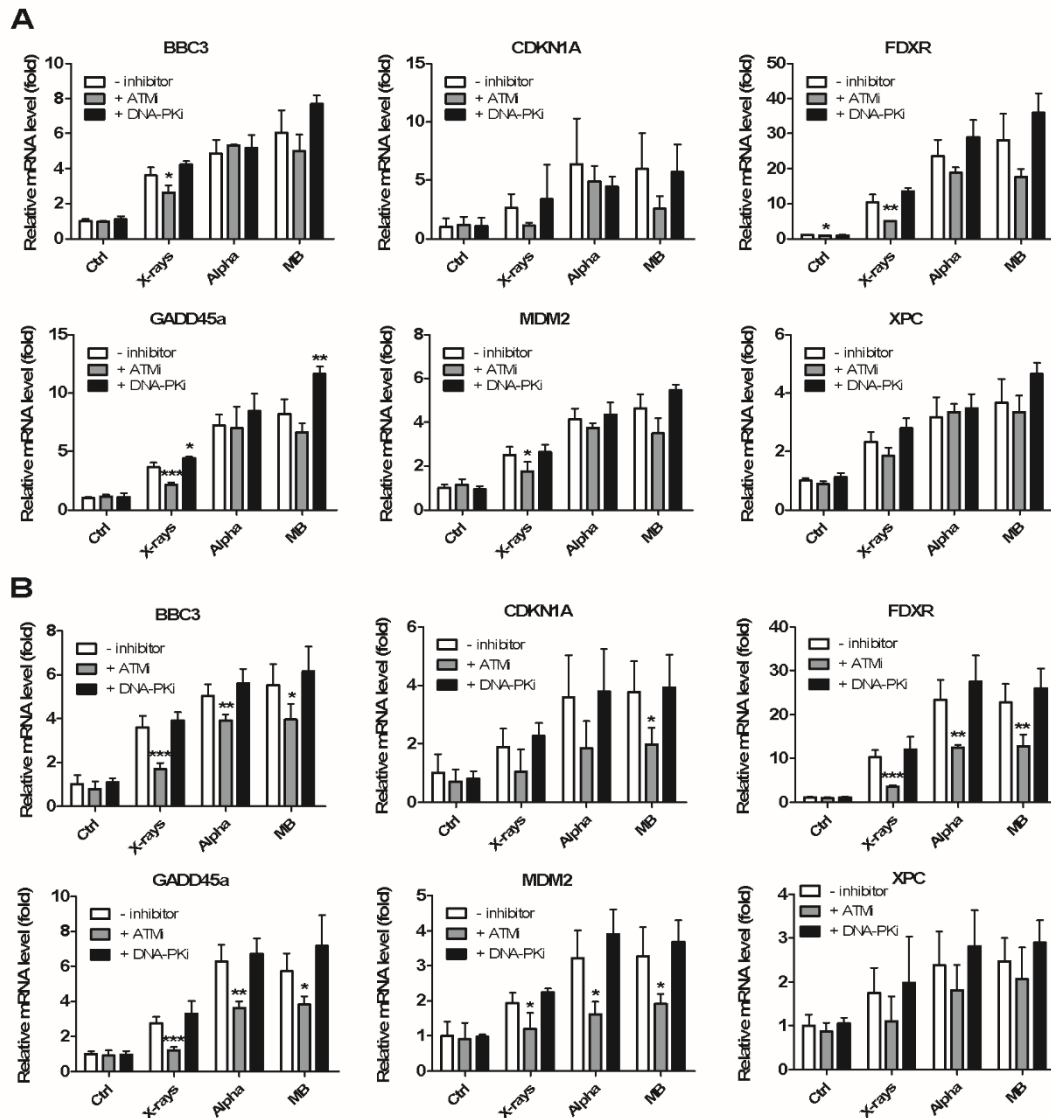

**Supplemental figure 2.** Gene expression levels in PBL 24 h after exposure to 1 Gy X-rays, alpha particles or mixed beams, respectively, with or without inhibition of ATM (KU55933) or DNA-PK (NU7026) in Donor 3 (a) and 4 (b). Mean results from 3 experiments are presented, relative to average control without inhibitor. Error bars represent standard deviations. Asterisks represent significant differences at the level of \* $<0.05$ , \*\* $<0.01$  and \*\*\* $<0.001$  of mRNA levels in PBL 24 h after the same exposure with inhibitor compared to without inhibitor (student t-test).
